# Supplementary material for: The Concerted Action of E2-2 and HEB Is Critical for Early Lymphoid Specification
Source: PubMed Central journal article supplement (PMC6433000; doi:10.3389/fimmu.2019.00455), 2019-03-18

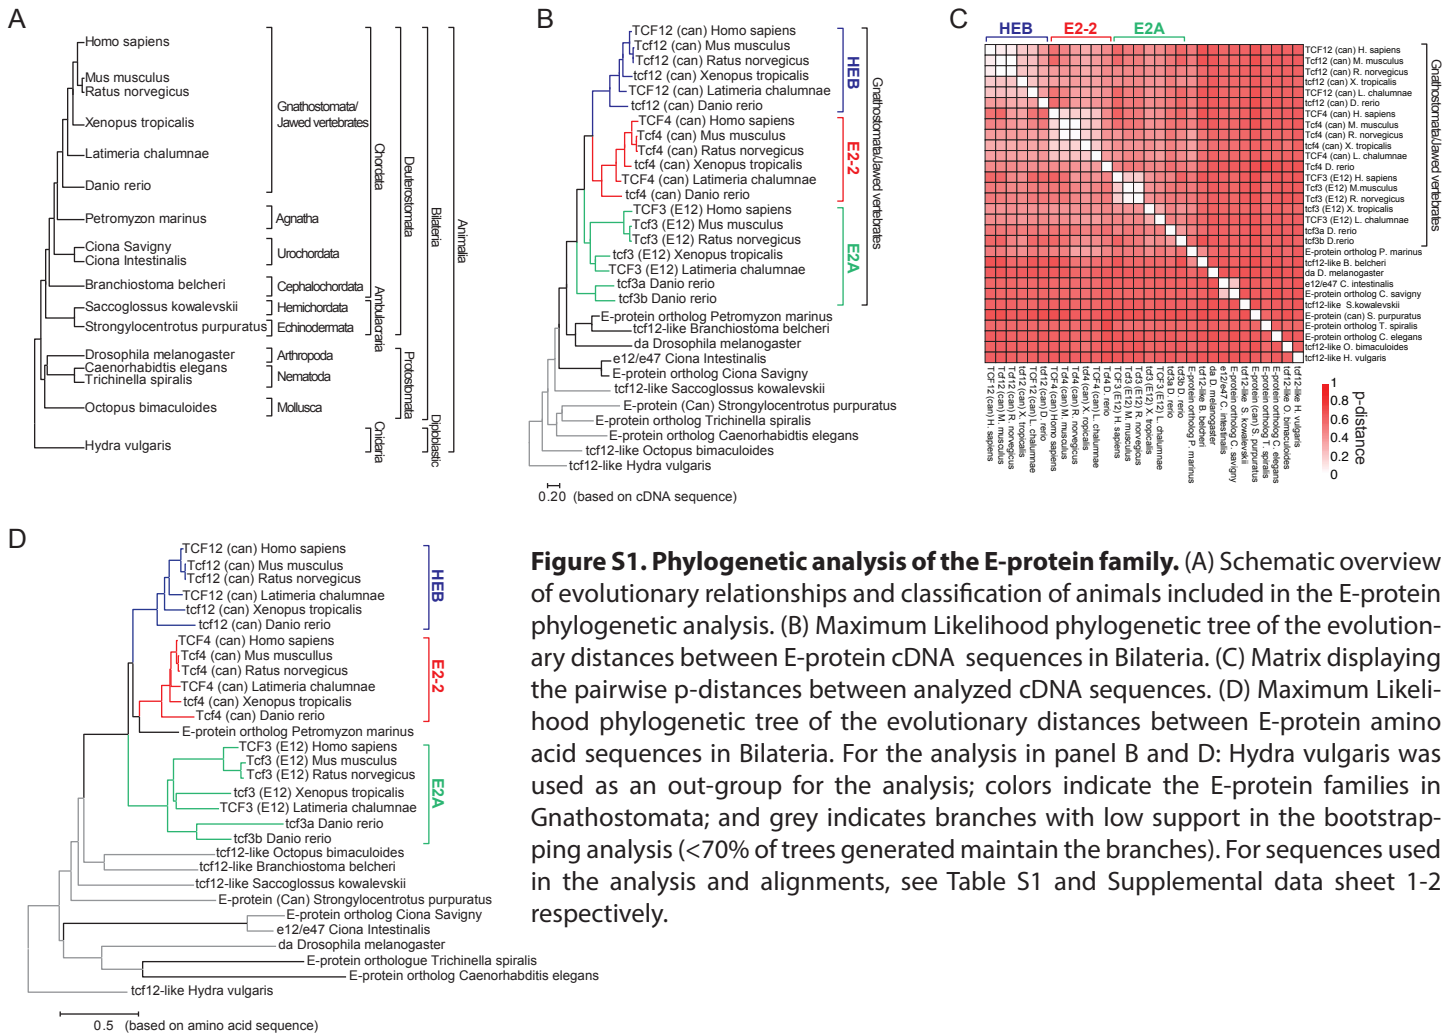

**Figure S1. Phylogenetic analysis of the E-protein family.** (A) Schematic overview of evolutionary relationships and classification of animals included in the E-protein phylogenetic analysis. (B) Maximum Likelihood phylogenetic tree of the evolutionary distances between E-protein cDNA sequences in Bilateria. (C) Matrix displaying the pairwise p-distances between analyzed cDNA sequences. (D) Maximum Likelihood phylogenetic tree of the evolutionary distances between E-protein amino acid sequences in Bilateria. For the analysis in panel B and D: *Hydra vulgaris* was used as an out-group for the analysis; colors indicate the E-protein families in Gnathostomata; and grey indicates branches with low support in the bootstrapping analysis (<70% of trees generated maintain the branches). For sequences used in the analysis and alignments, see Table S1 and Supplemental data sheet 1-2 respectively.

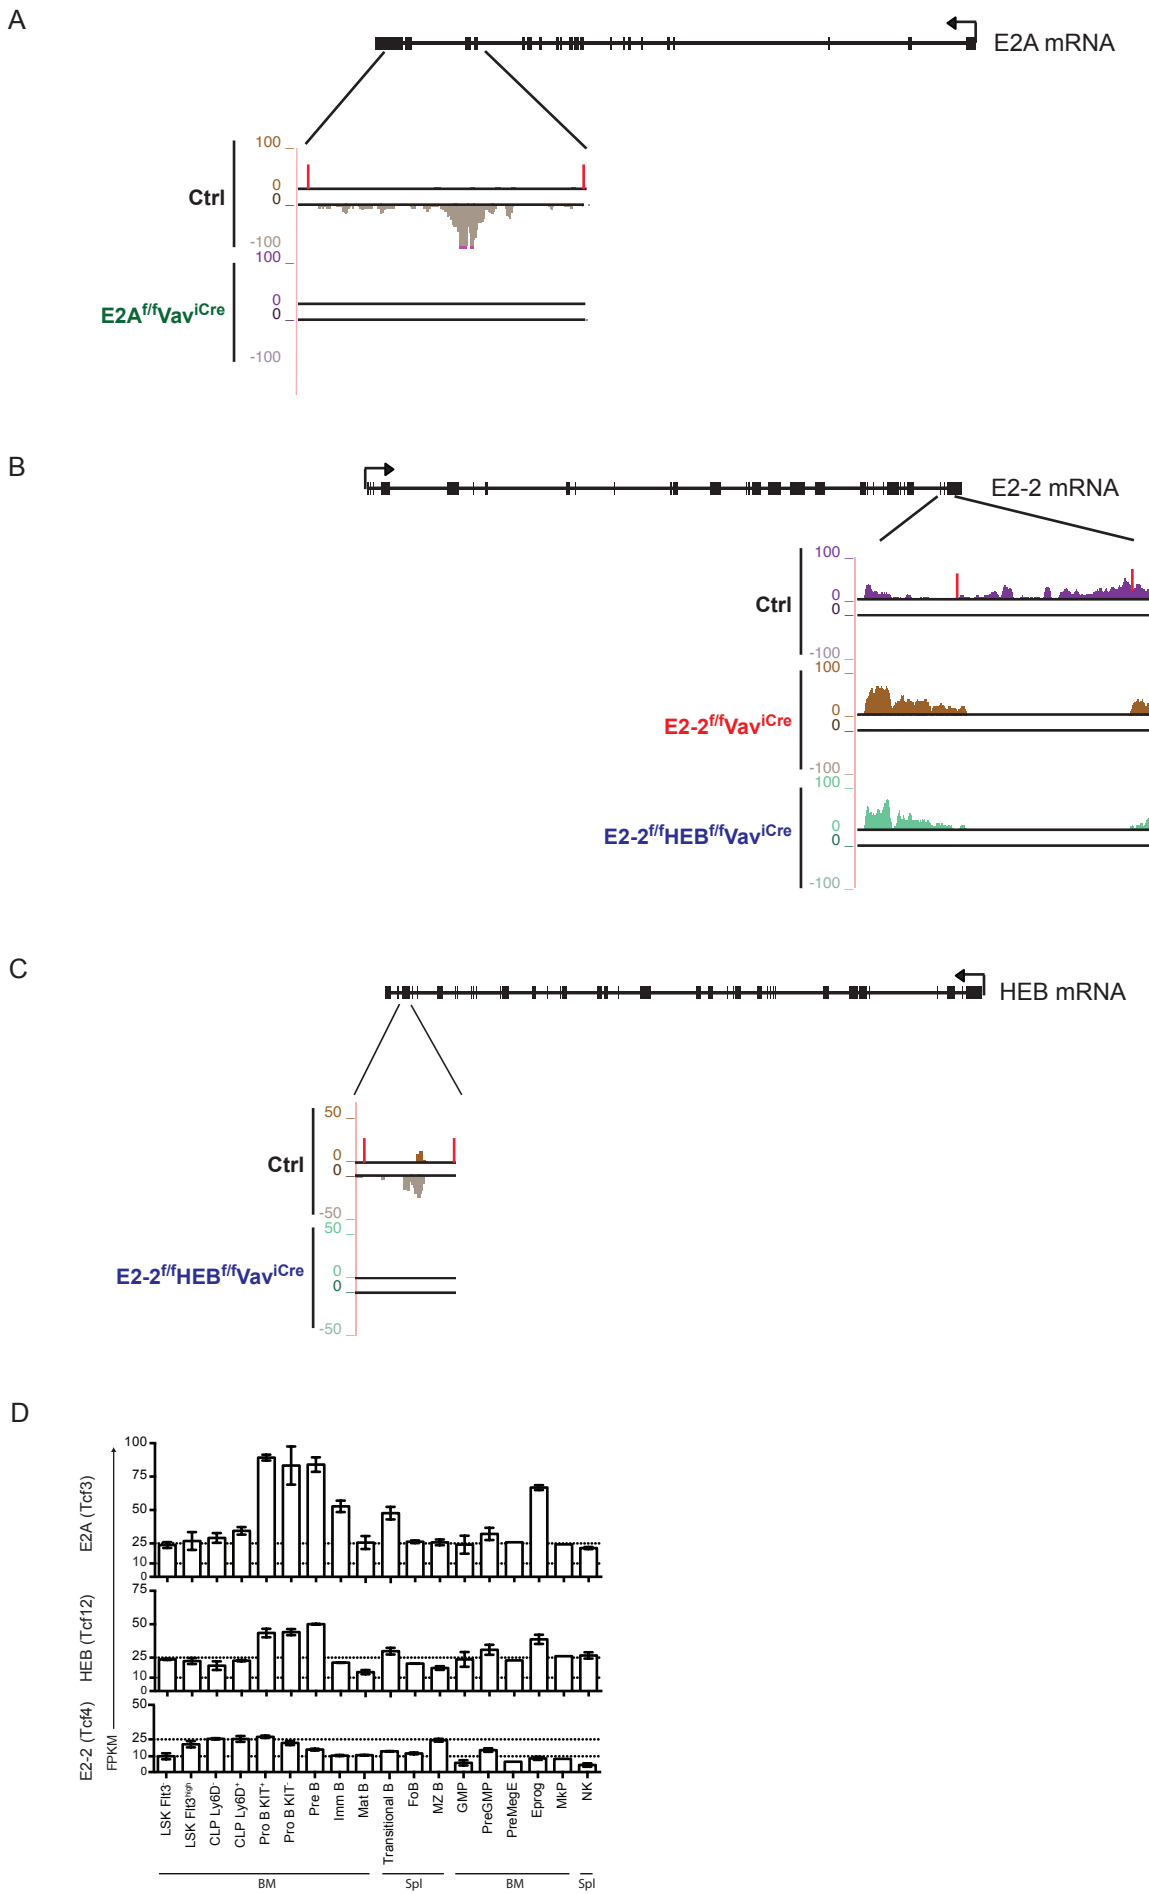

**Figure S2. Expression pattern and deletion of floxed exons of E2A, E2-2 and HEB.** (A-C) RNA expression of the floxed E-protein exons in mice with indicated genotypes. Locations of loxP sites are indicated with red lines. (D) Expression (RPKM) of the E-proteins in indicated cell types from bone marrow (BM) and spleen (Spl).

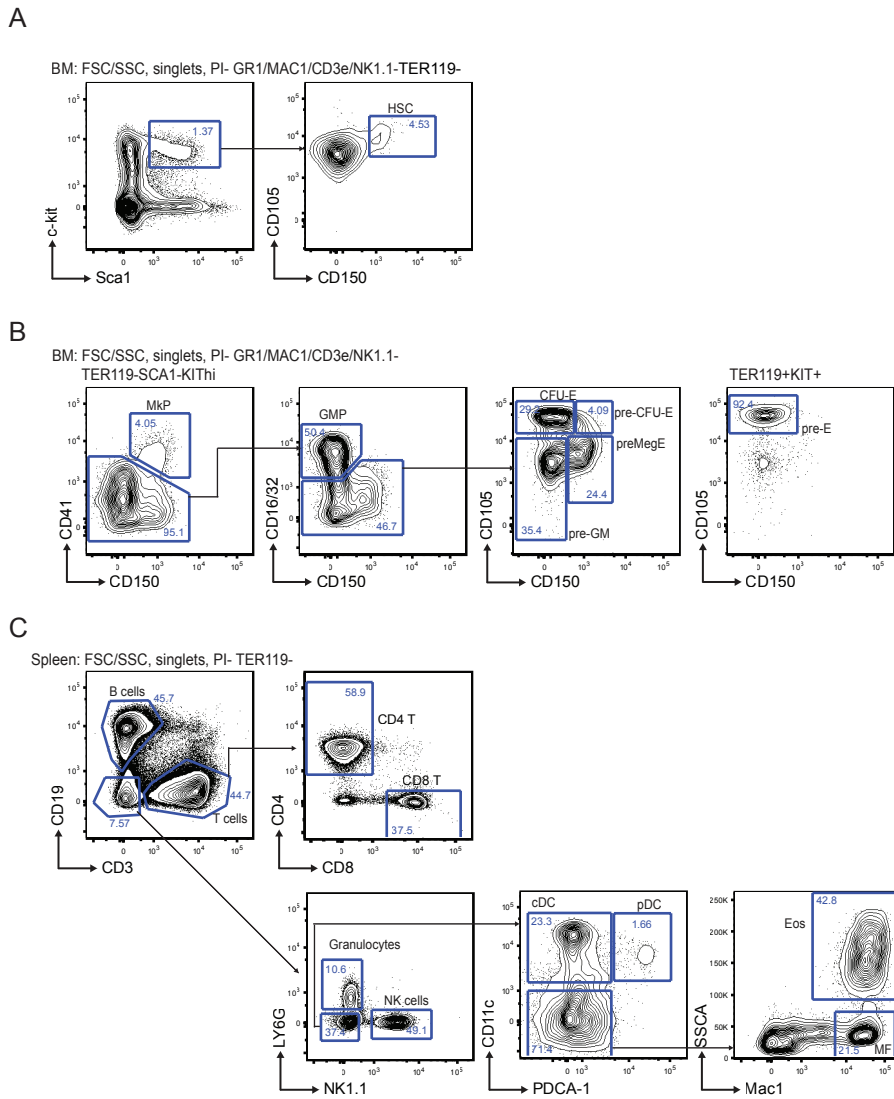

**Figure S3. Gating strategies for identification of hematopoietic cells.** Gating strategy for the identification of (A) hematopoietic stem cells (HSCs) and (B) erythro-myeloid progenitors (B) in bone marrow. (C) Gating strategy for the identification of mature hematopoietic cell types (CD4/8 T-cells, CD4/8 T; granulocytes, Gr; NK-cells, NK; conventional dendritic cells, cDC; plasmacytoid dendritic cells, pDC; eosinophiles, Eos; and macrophages, MF) in spleen.

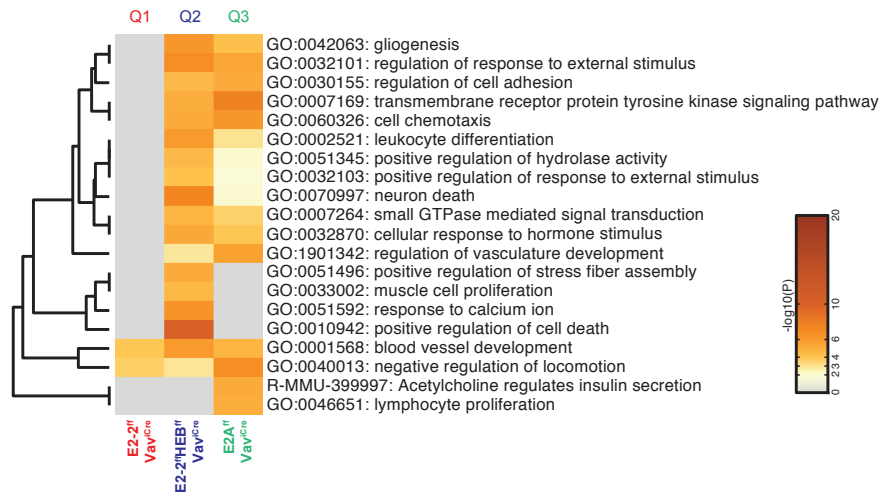

**Figure S4. Functional annotation of genes differentially expressed in E-protein deficient animals.** Metascape (gene ontology) analysis of genes with significantly differential expression (adjusted p-value <0.01, Q1-3 in Fig. 5B) in LY6D- CLPs from the indicated genotypes (as compared to LY6D- CLPs from control animals).

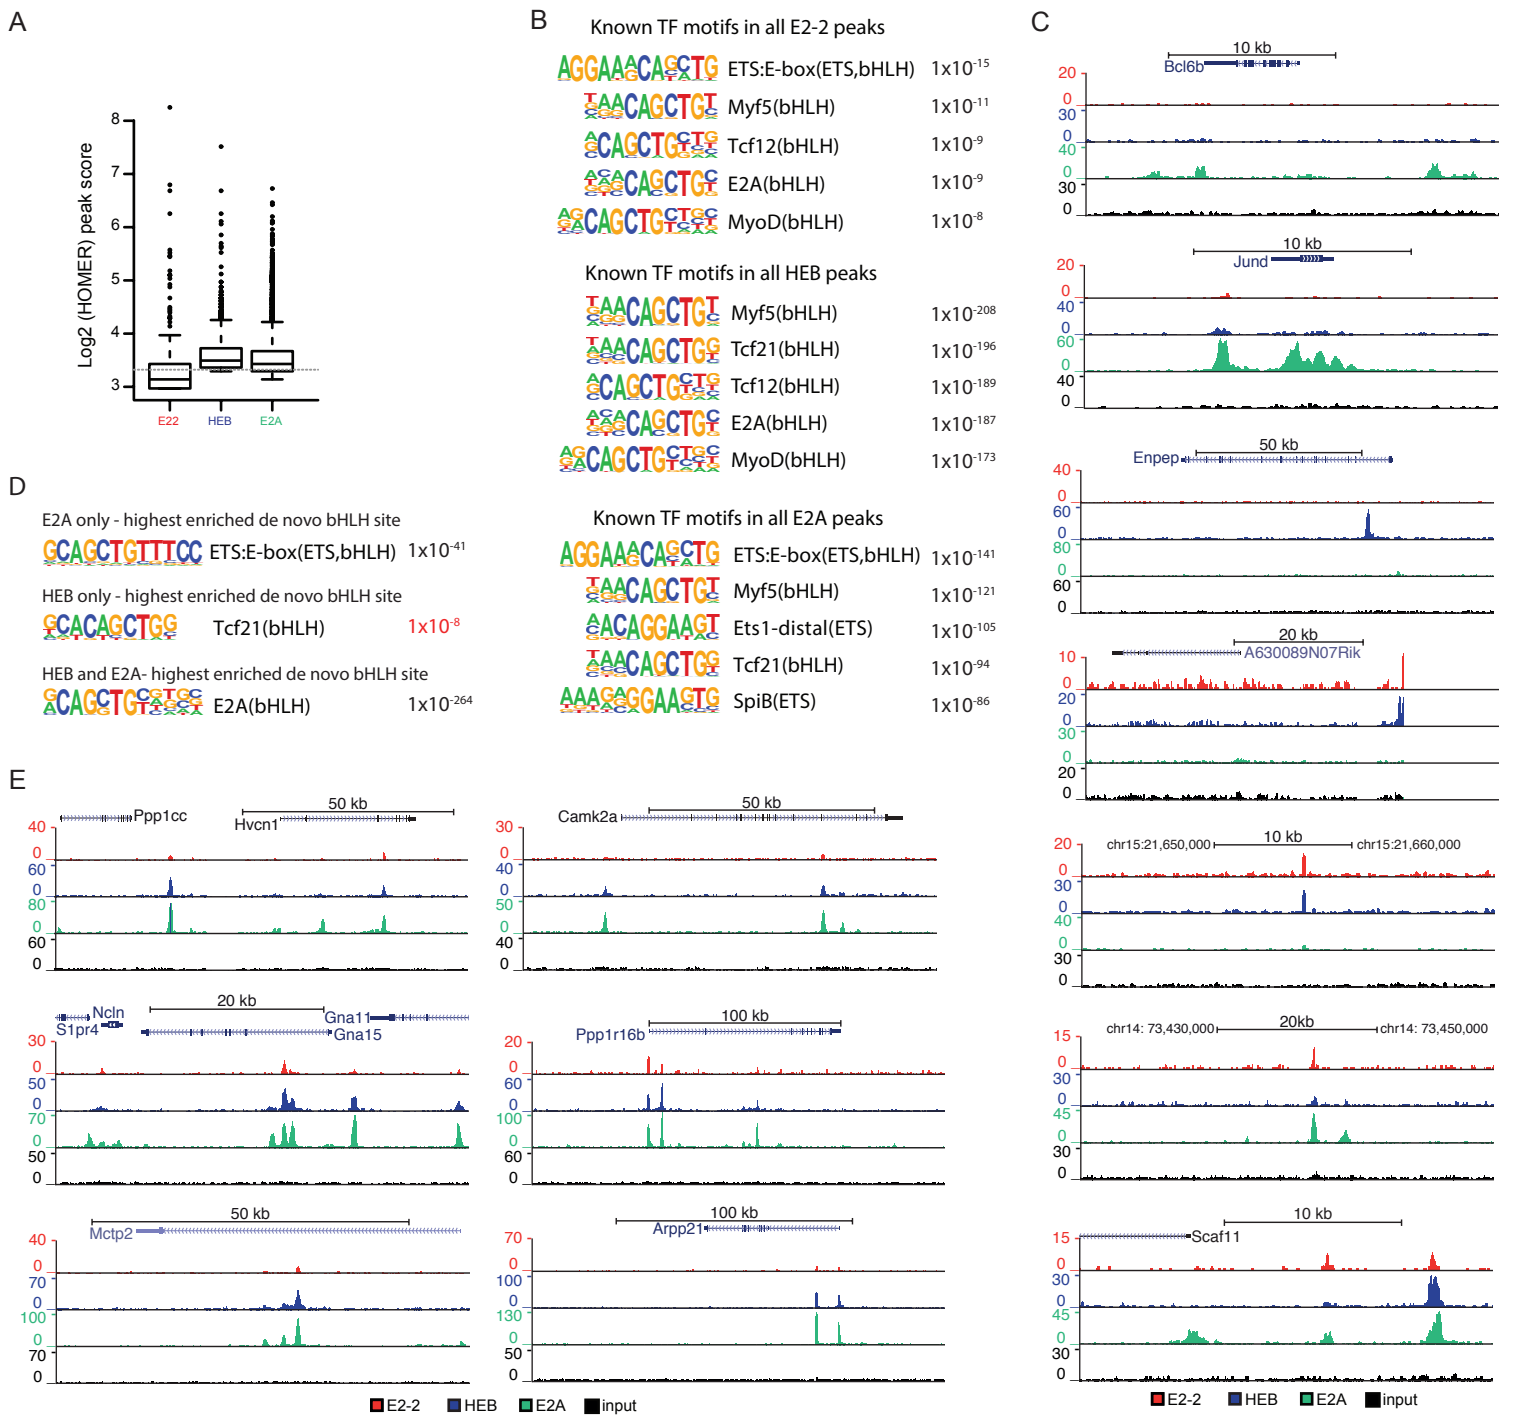

**Figure S5. Enrichment of transcription factor binding motifs in E2A and HEB bound regions.** (A) Peak scores (HOMER peak quality score) of all identified E2-2, HEB and E2A peaks before filtering on peak score. Only peaks with peak score  $\geq 10$  were considered for further analysis. The peak score cut-off is indicated with a grey dotted line. (B) Enrichment of known transcription factor binding sites in E2-2, HEB and E2A peaks. Top five most significantly enriched binding motifs are shown together with their corresponding enrichment p-value. (C) Examples of regions displaying biased E-protein binding. (D) De novo motif enrichment analysis of regions displaying combined E-protein (HEB and E2A) binding, only E2A binding or only HEB binding. The top significantly enriched bHLH motif identified is displayed together with the enrichment p-value. E2-2 binding was not considered, as the number of regions is too low to perform relevant motif enrichment analysis. (E) Genome browser tracks showing E-protein near central B-lineage genes. (F) De novo motif enrichment analysis of regions containing bHLH motifs that display combined E-protein binding or only E2A binding. Significantly enriched motifs are shown together with the corresponding enrichment p-value and the percentage of target sequences containing the identified motif.

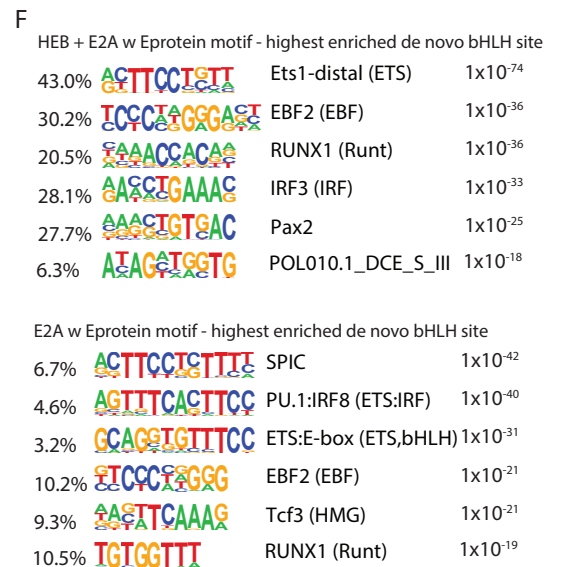

Supplement: Image_1.pdf [file Image_1.pdf]
